# Supplementary material for: Optically active helical polyacetylene/Fe3O4 composite microspheres: prepared by precipitation polymerization and used for enantioselective crystallization
Source: Royal Society of Chemistry journal article supplement (doi:10.1039/c4ra12267d), 2014-01-01
Supplement: c4ra12267d1.pdf [file c4ra12267d1.pdf]

*Supporting Information*

Optically active helical polyacetylene/Fe<sub>3</sub>O<sub>4</sub> composite microspheres: prepared by precipitation polymerization and used for enantioselective crystallization

Huaiyu Chen, Lei Li, Dong Liu, Huajun Huang, Jianping Deng\* and Wantai Yang

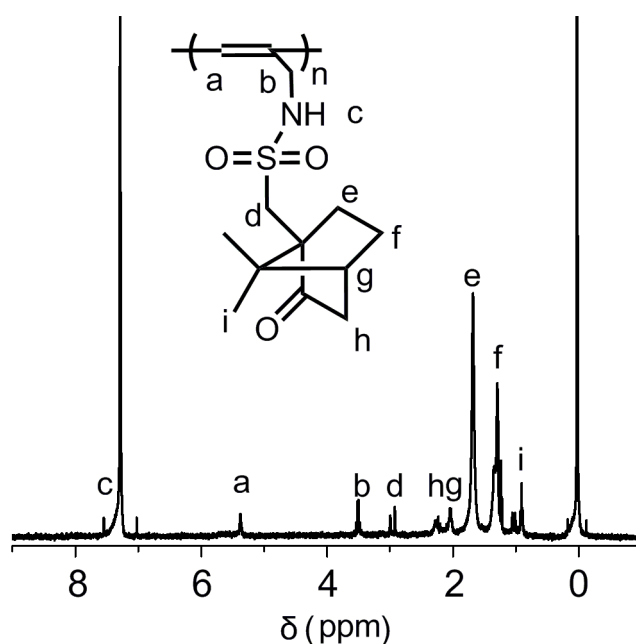

**Figure S1.** <sup>1</sup>H NMR spectra of the pure PSA (CDCl<sub>3</sub>).

The microspheres were dissolved in tetrahydrofuran, the Fe<sub>3</sub>O<sub>4</sub> NPs were excluded with a magnet, and then the residual tetrahydrofuran solution was added into n-hexane to obtain the pure PSA. Finally the pure PSA was dissolved in CDCl<sub>3</sub> to obtain the solution for NMR measurement.

<sup>1</sup>H NMR (CDCl<sub>3</sub>, 400MHz): δ 0.91–0.98 (C=OCC(CH<sub>3</sub>)<sub>2</sub>), 1.43–1.45 (CCH<sub>2</sub>CH<sub>2</sub>CH), 1.91–2.13 (CCH<sub>2</sub>CH<sub>2</sub>CH), 2.38–2.42 (C=OCH<sub>2</sub>), 3.02–3.05 (O=S=OCH<sub>2</sub>), 3.70–3.72 (CH=CCH<sub>2</sub>), 5.58–5.70 (CH=C).

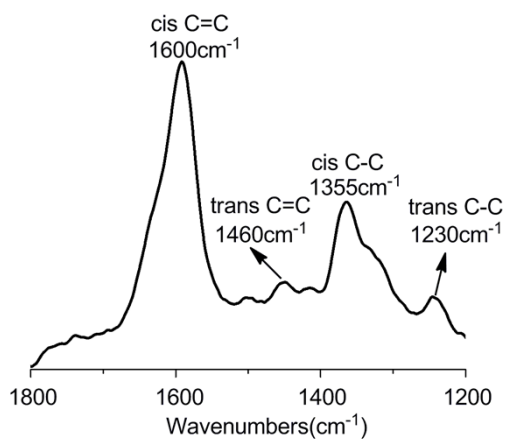

**Figure S2.** Typical Raman spectrum of pure PSA.

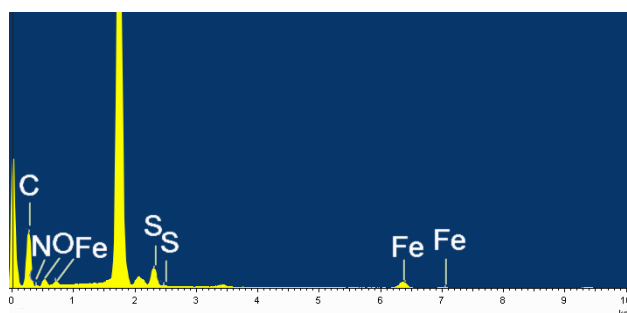

**Figure S3.** Energy dispersive X-ray (EDX) spectrum data of CMMSs-1.

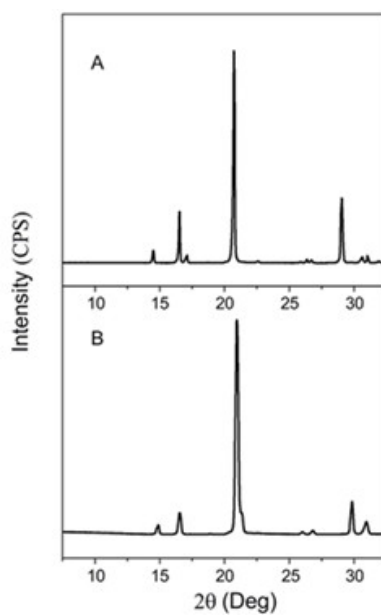

**Figure S4.** XRD patterns of pure L-alanine (A) and L-alanine obtained via enantioselective crystallization by using S-PSA microspheres (CMMSs-1).
